# Supplementary material for: Lamellar microdomain orientation and phase transition of polystyrene-b-poly(methyl methacrylate) films by controlled interfacial interactions
Source: Royal Society of Chemistry journal article supplement (doi:10.1039/c2sm07297a), 2012-01-01
Supplement: c2sm07297a.pdf [file c2sm07297a.pdf]

**Electronic Supplementary Information (ESI) available:**

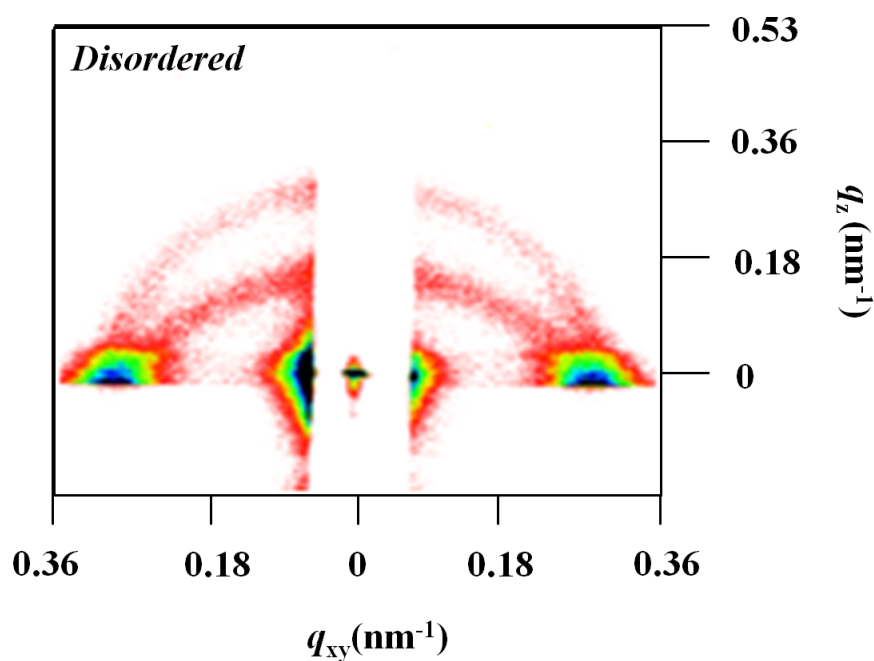

This Fig. shows the GISAXS pattern for a disordered BCP film at elevated temperature ( $\sim 200$  °C). It exhibits two arc-shaped diffuse scattering patterns arising from a correlation hole scattering by compositional fluctuations.
